# Supplementary material for: Ultra-fine porous SnO2 nanopowder prepared via a molten salt process: a highly efficient anode material for lithium-ion batteries
Source: Royal Society of Chemistry journal article supplement (doi:10.1039/b821519g), 2009-01-01
Supplement: b821519g.pdf [file b821519g.pdf]

## Supporting Information

**Table S1** Comparison of the high rate performance of the SnO<sub>2</sub> in this work with those that have been reported in the literatures

| Samples                                | Synthetic Method                 | Potential range (V vs. Li/Li <sup>+</sup> ) | High rate         | Capacity (mAh/g)                    | Reference |
|----------------------------------------|----------------------------------|---------------------------------------------|-------------------|-------------------------------------|-----------|
| SnO <sub>2</sub> nanoparticles         | Molten salt                      | 1.5-0.05                                    | 1C<br>5C<br>10C   | about 520<br>about 400<br>about 300 | This work |
| SnO <sub>2</sub> nanowire              | SBA-15 template                  | 1.2-0                                       | 3C<br>5C<br>10C   | 700<br>about 500<br>about 200       | [15]      |
| Mesoporous SnO <sub>2</sub>            | KIT-6 template                   |                                             | 3C<br>5C<br>10C   | 760<br>740<br>730                   |           |
| Li <sub>2</sub> O-CuO-SnO <sub>2</sub> | Electrostatic spray deposition   |                                             | 1.5-0             | 1C<br>5C<br>8C                      |           |
| Ni <sub>3</sub> Sn <sub>4</sub>        | Electrodeposition on Cu nanorods | 1.5-0.02                                    | 0.8C<br>5C<br>10C | about 500<br>about 250<br>about 180 | [9]       |

In table S1, we list the reported high rates performances of tin based anode materials. The present results are comparable. Considering molten salt method is template or surfactant free, the synthetic process is easiest to achieve and scale-up, it is promising for large scale application.

## References

- 15 H. Kim and J. Cho, *J. Mater. Chem.*, 2008, **18**, 771.
- 37 Y. Yu, C.-H. Chen and Y. Shi, *Adv. Mater.*, 2007, **19**, 993.
- 9 J. Hassoun, S. Panero, P. Simon, P.-L. Taberna and B. Scrosati, *Adv. Mater.*, 2007, **19**, 1632.
